# Supplementary material
Source: publisher site journal article supplement (https://www.dovepress.com/get_supplementary_file.php?f=224198.docx)
Supplement: Supplementary file 1 [file get_supplementary_file.php]

**S-Table 1** The relative risk and their 95% conﬁdence intervals of extreme and moderate cold effects on AECOPD hospitalizations over lag 30 days by sex and age groups.

|  | Mean temperature(℃) | | Apparent temperature(℃) | |
| --- | --- | --- | --- | --- |
|  | Extreme cold (95%CI) | Moderate cold (95%CI) | Extreme cold (95%CI) | Moderate cold (95%CI) |
| Total | 1.05(1.02,1.08) * | 1.03(1.00,1.06) * | 1.04(1.02,1.06) * | 1.01(0.99,1.04) |
| Sex |  |  |  |  |
| Male | 1.04(1.01,1.07) * | 1.02(0.99,1.05) | 1.03(1.01,1.06) * | 1.01(0.98,1.03) |
| Female | 1.06(1.03,1.09) * | 1.04(1.00,1.07) * | 1.05(1.03,1.08) * | 1.02(0.99,1.05) |
| Age |  |  |  |  |
| ＜65 years | 1.01(0.95,1.07) | 1.01(0.95,1.07) | 1.05(1.02,1.08) * | 1.05(1.01,1.09) * |
| ≥65  years | 1.05(1.02,1.07) * | 1.02(0.99,1.05) | 1.04(1.02,1.06) * | 1.01(0.98,1.03) |

**Note.***P< 0.05; Extreme cold effect presents relative risk for per 1 °C decrease from 25th percentile temperature to 1st percentile of mean temperature and apparent temperature; Moderate cold effect presents relative risk for per 1 °C decrease from 25th percentile temperature to 10th percentile of mean temperature and apparent temperature.

**S-Table 2** The cumulative relative risk and their 95% conﬁdence intervals of extreme and moderate hot effects on AECOPD hospitalizations over lag 30 days by sex and age groups.

|  | Mean temperature(℃) | | Apparent temperature(℃) | |
| --- | --- | --- | --- | --- |
|  | Extreme hot (95%CI) | Moderate hot (95%CI) | Extreme hot (95%CI) | Moderate hot (95%CI) |
| Total | 1.02(0.98,1.06) | 1.02(0.98,1.06) | 1.01(0.99,1.04) | 1.01(0.99,1.04) |
| Sex |  |  |  |  |
| Male | 1.02(0.98,1.07) | 1.02(0.98,1.07) | 1.01(0.98,1.04) | 1.01(0.98,1.04) |
| Female | 1.02(0.97,1.07) | 1.02(0.97,1.06) | 1.02(0.98,1.05) | 1.01(0.98,1.05) |
| Age |  |  |  |  |
| ＜65 years | 1.06(1.01,1.11) * | 1.05(1.01,1.10) * | 1.00(0.96,1.05) | 1.00(0.96,1.04) |
| ≥65  years | 1.03(0.99,1.07) | 1.02(0.99,1.06) | 1.34(0.99,1.05) | 1.02(0.99,1.27) |

**Note.***P< 0.05; Extreme hot effect presents relative risk for per 1 °C increase from 75th percentile temperature to 99th percentile of mean temperature and apparent temperature. Moderate hot effect presents relative risk for per 1 °C increase from 75th percentile temperature to 90th percentile of mean temperature and apparent temperature.
